# Supplementary material for: Effects of vertical ship exhaust plume distributions on urban pollutant concentration – a sensitivity study with MITRAS v2.0 and EPISODE-CityChem v1.4
Source: Copernicus journal article supplement (doi:10.5194/gmd-15-4077-2022), 2022-05-25
Supplement: Supplementary file [file gmd-15-4077-2022-supplement-title-page.pdf › gmd-15-4077-2022-supplement-title-page.pdf]

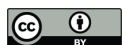

## *Supplement of*

# **Effects of vertical ship exhaust plume distributions on urban pollutant concentration – a sensitivity study with MITRAS v2.0 and EPISODE-CityChem v1.4**

**Ronny Badeke et al.**

*Correspondence to:* Ronny Badeke ([ronny.badeke@hereon.de](mailto:ronny.badeke@hereon.de))

- [gmd-15-4077-2022-supplement-title-page.pdf](#)
- [ReadMe.txt](#)
- [multilinear\\_Regression\\_Hup.py](#)
- [multilinear\\_Regression\\_expgauss.py](#)
- [multilinear\\_Regression\\_gauss.py](#)
- [regression\\_data\\_Hup.csv](#)
- [regression\\_data\\_expgauss.csv](#)
- [regression\\_data\\_gauss.csv](#)

The copyright of individual parts of the supplement might differ from the article licence.
